# Supplementary material for: The Three-Herb Formula Shuang-Huang-Lian stabilizes mast cells through activation of mitochondrial calcium uniporter
Source: PubMed Central journal article supplement (PMC5206722; doi:10.1038/srep38736), 2017-01-03
Supplement: srep38736-s1.pdf [file srep38736-s1.pdf]

# The Three-Herb Formula Shuang-Huang-Lian stabilizes mast cells through activation of mitochondrial calcium uniporter

Yuan Gao, Rui Hou, Qiaoling Fei, Lei Fang, Yixin Han, Runlan Cai, Cheng Peng\*  
and Yun Qi\*

## Supplemental material

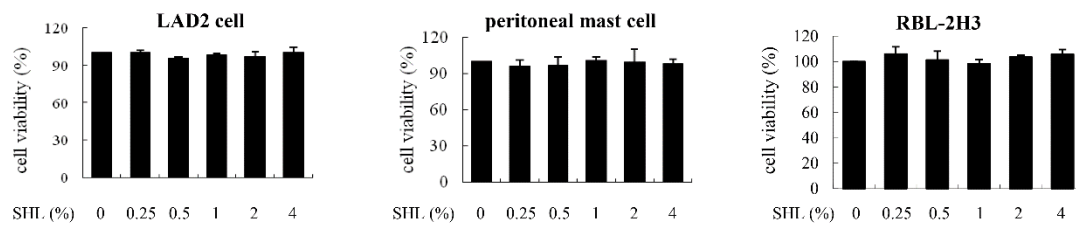

**Fig. S1.** Effects of SHL on the cells' viability. LAD2 cells, peritoneal MCs or RBL-2H3 cells were incubated with SHL at the indicated concentrations for 24 h and the cell viability was evaluated by MTS assay. Data represents the mean  $\pm$ SD of three independent experiments.

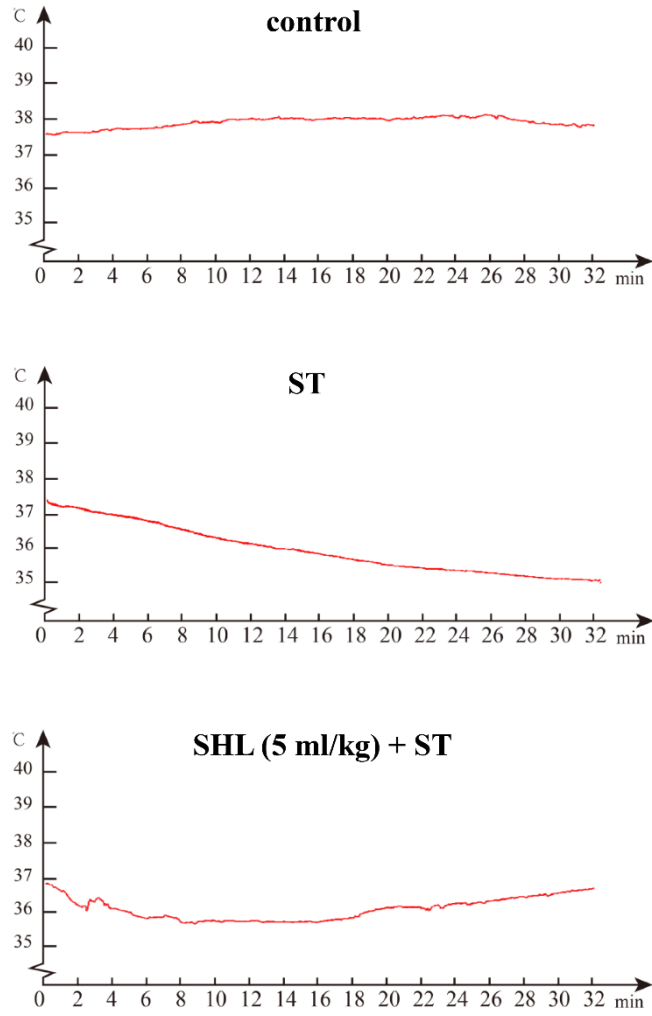

**Fig. S2.** Typical tracing showing the effect of SHL on the body temperature of PSA mice.

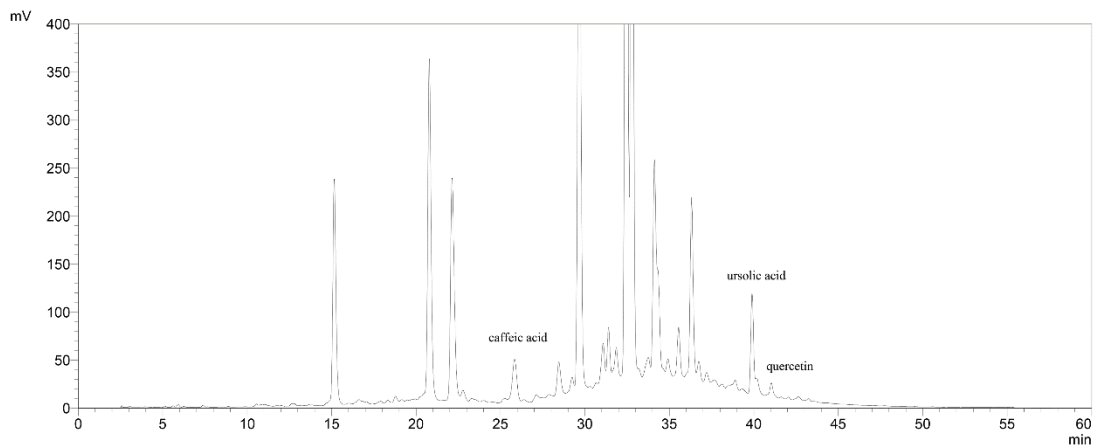

**Fig. S3** A representative chromatogram of caffeic acid, ursolic acid and quercetin.

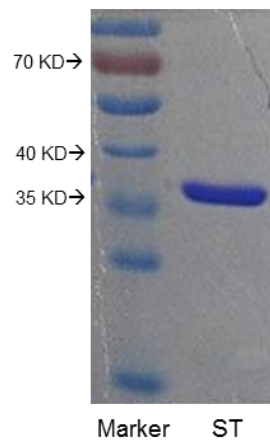

**Fig. S4.** Analysis of ST extracted from the *Metapenaeus ensis* by SDS-PAGE.

**Table S1** Herbal sources of 26 constituents in the ELF.

| No. | Constituent            | Source                   |                    |
|-----|------------------------|--------------------------|--------------------|
|     |                        | Lonicerae Japonicae Flos | Fructus Forsythiae |
| 1   | neochlorogenic acid    | +                        |                    |
| 2   | luteolin               | +                        |                    |
| 3   | chrysophanol           |                          | +*                 |
| 4   | oleanolic acid         |                          | +                  |
| 5   | isopimpinellin         |                          | +*                 |
| 6   | rutin                  | +                        | +                  |
| 7   | cryptochlorogenic acid | +                        |                    |
| 8   | physcion               |                          | +*                 |
| 9   | methyl salicylate      |                          | +                  |
| 10  | D-(-)-quinic acid      | +                        |                    |
| 11  | isochlorogenic acid A  | +                        |                    |
| 12  | isochlorogenic acid B  | +                        |                    |
| 13  | isochlorogenic acid C  | +                        |                    |
| 14  | quercitrin             | +                        |                    |
| 15  | quercetin              | +                        | +                  |
| 16  | chlorogenic acid       | +                        |                    |
| 17  | eugenol                | +                        |                    |
| 18  | forsythiaside B        |                          | +                  |
| 19  | hyperin                | +                        |                    |
| 20  | ursolic acid           |                          | +                  |
| 21  | caffeic acid           | +                        | +                  |
| 22  | acetophenone           |                          | +                  |
| 23  | forsythiaside          |                          | +                  |
| 24  | forsythin              |                          | +                  |
| 25  | forsythiaside E        |                          | +                  |
| 26  | caffeoylquinic acid    | +                        |                    |

\* These constituents had been identified in the SHL injection, but their herbal sources had not been confirmed.
